# Supplementary material for: Prediction of polyreactive and nonspecific single-chain fragment variables through structural biochemical features and protein language-based descriptors
Source: PubMed Central journal article supplement (PMC9720949; doi:10.1186/s12859-022-05010-4), 2022-12-05
Supplement: 12859_2022_5010_MOESM1_ESM.pdf [file 12859_2022_5010_MOESM1_ESM.pdf]

## Supporting Information for

### **Prediction of polyreactive and nonspecific single-chain fragment variables through structural biochemical features and protein language-based descriptors.**

Hocheol Lim<sup>a,b</sup> and Kyoung Tai No<sup>a,b,c,\*</sup>

<sup>a</sup> The Interdisciplinary Graduate Program in Integrative Biotechnology and Translational Medicine, Yonsei University, Incheon 21983, Republic of Korea

<sup>b</sup> Bioinformatics and Molecular Design Research Center (BMDRC), Incheon 21983, Republic of Korea

<sup>c</sup> Baobab AiBIO Co., Ltd., Incheon 21983, Republic of Korea

\* Corresponding author: Kyoung Tai No (ktno@yonsei.ac.kr)

Supporting information for ‘Prediction of polyreactive and nonspecific single-chain fragment variables through structural biochemical features and protein language-based descriptors’ includes Figures S1 – S2 for the violin plots of the statistically significant factors in scFvs and Figure S3 for correlation plots of the experimental IEPs and predicted IEPs in peptides and antibodies. It also includes Tables S1 – S2 for hyperparameter tuning and Tables S3 – S4 for the classifying performance of biochemical features in scFvs against polyreactivity.

In this study, there are many abbreviations as follows. AUC, Area under the receiver operating characteristics curve; AVG, Average-based ensemble learning; CDR, Complementary-determining regions; ELISA, Enzyme-linked immunosorbent assay; ESM, Evolutionary scale modeling; FACS, Fluorescence-activated cell sorting; GBM, Gradient boosting; IEP, Isoelectric points; LGBM, Light gradient boosting; LR, Linear regression-based ensemble learning; mAbs, Monoclonal antibodies; ML, Machine learning; NLP, Natural language processing; RF, Random forest; ROC, Receiver operating characteristics; SAP, Spatial aggregation propensity; SASA, Solvent-accessible surface area; scFvs, Single-chain fragment variables; SVM, Support vector machine; TAPE, Tasks assessing protein embeddings; trRosetta, Transform-restrained Rosetta; XGB, Extreme gradient boosting.

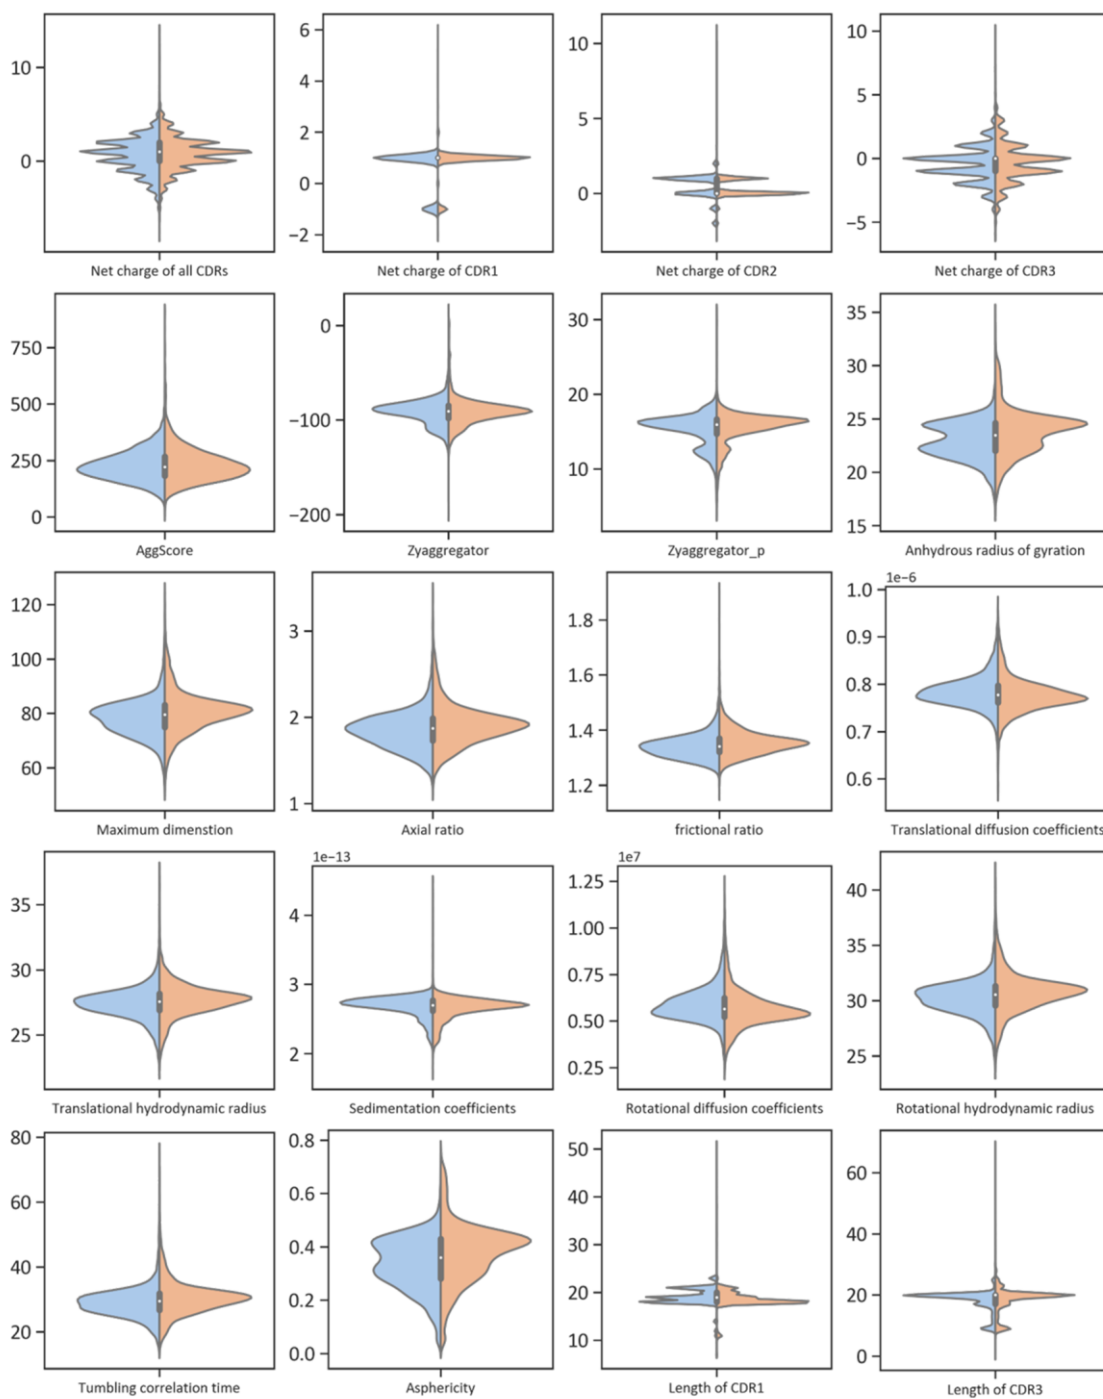

**Figure S1. Violin plots for the physicochemical properties of scFvs.**

Polyreactive mAbs are colored in red, while nonpolyreactive mAbs are colored in blue. Only statistically significant features ( $p$ -value  $< 0.001$ ) are shown. The units of the features are summarized in Table S2.

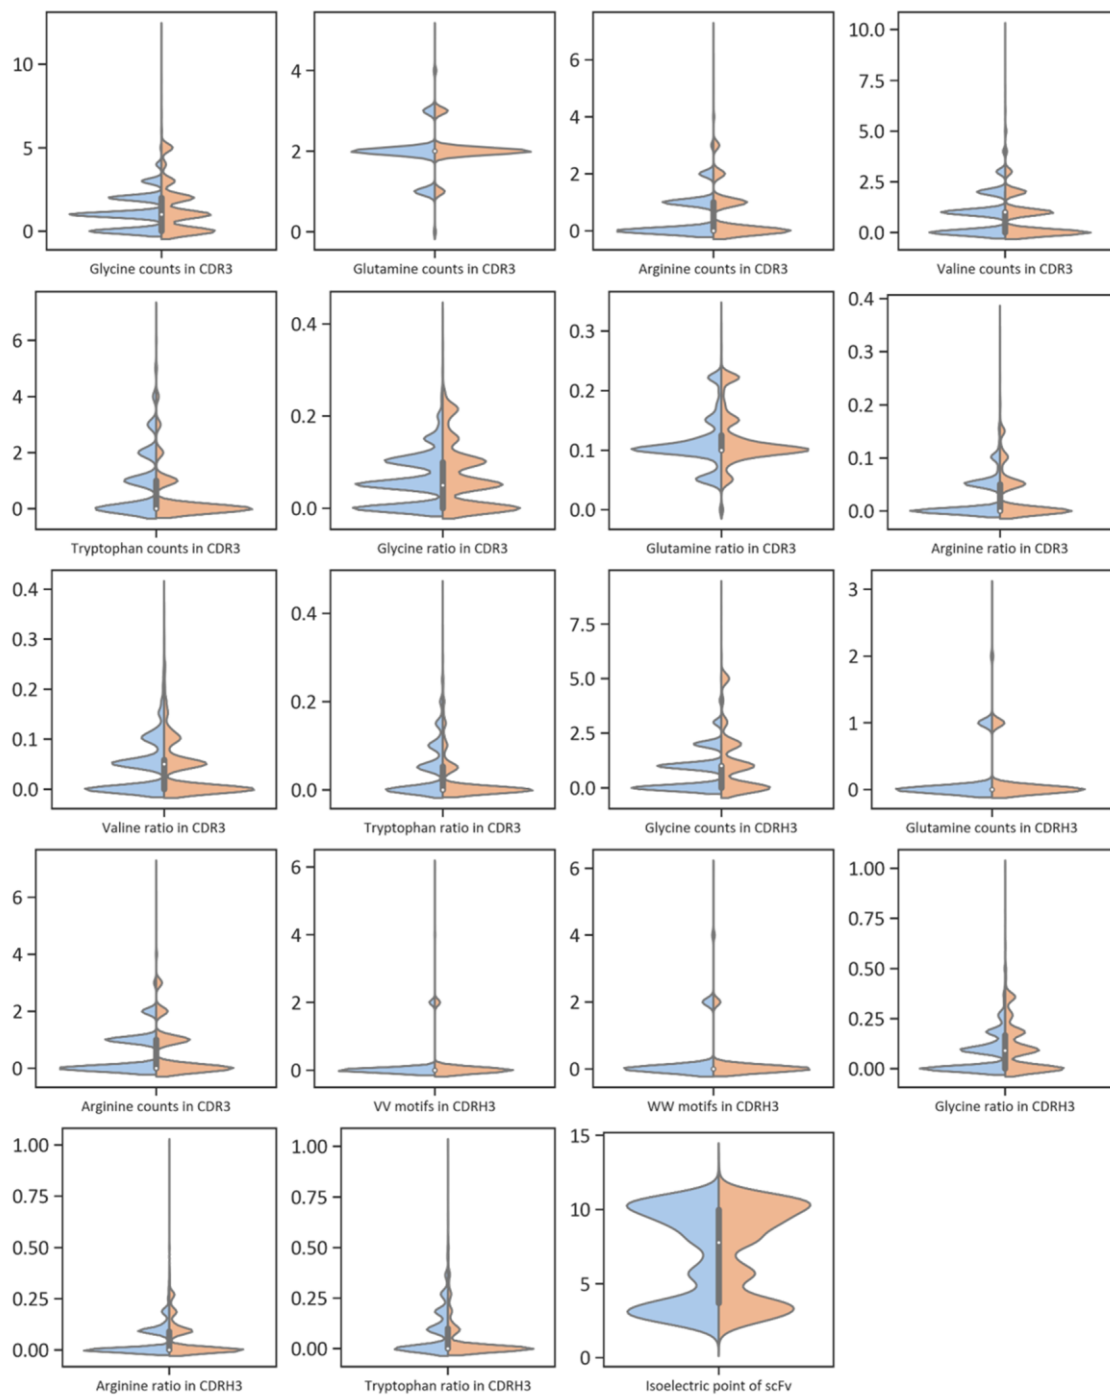

**Figure S2. Violin plots for the polyreactive motifs and isoelectric points of scFvs.**

Polyreactive mAbs are colored in red, while nonpolyreactive mAbs are colored in blue. Only statistically significant features (p-value < 0.001) are shown. The units of the features are summarized in Table S3.

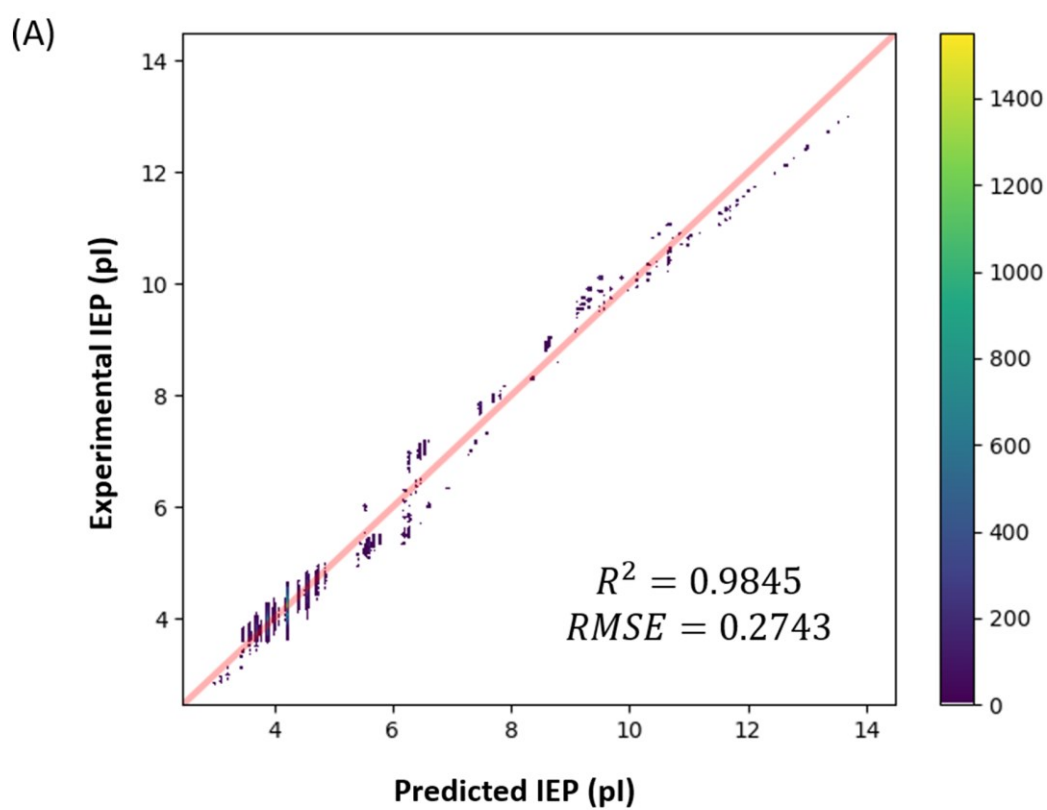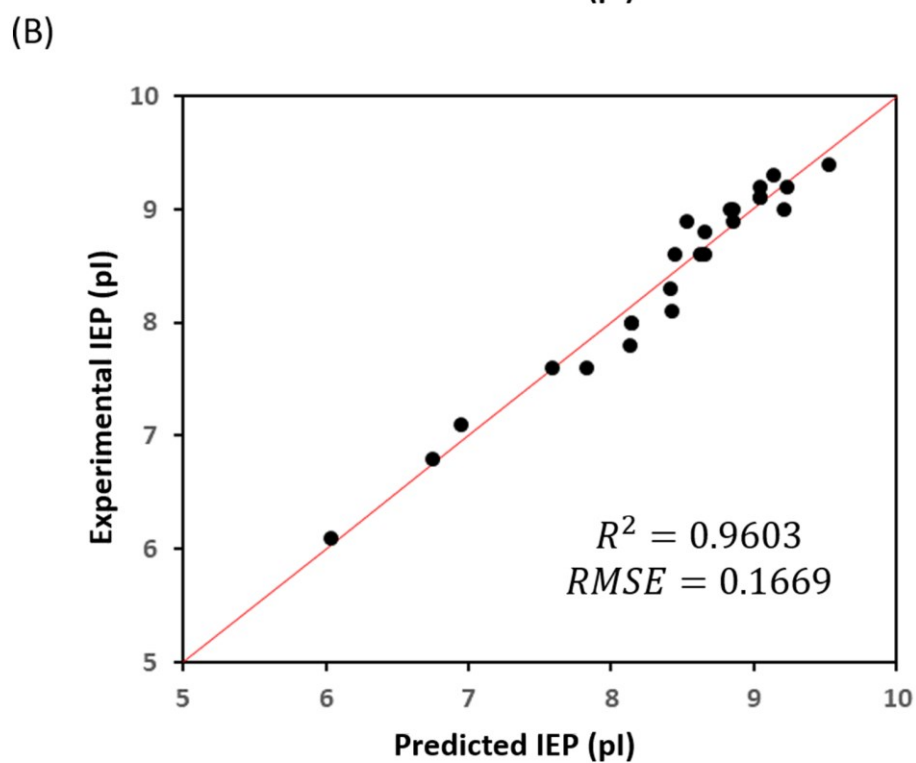

**Figure S3. Correlation plots between the experimental IEPs and predicted IEPs.**

(A) The correlation plot in 41,943 peptides. (B) The correlation plots in 25 antibodies.

**Table S1. Hyperparameter setting for tuning procedure**

| <b>Method</b> | <b>Tuning parameters</b>                                                                                                                               | <b>Fixed parameters</b>                                                               |
|---------------|--------------------------------------------------------------------------------------------------------------------------------------------------------|---------------------------------------------------------------------------------------|
| GBM           | n_estimators = 50, 100, 500, 1000, 1500, 2000, 2500, 3000<br>max_depth = 10, 15<br>max_features = 'auto', 'sqrt', 'log2'<br>learning_rate = 0.01, 0.05 |                                                                                       |
| LGBM          | n_estimators = 50, 100, 500, 1000, 1500, 2000, 2500, 3000<br>learning_rate = 0.01, 0.05                                                                | class_weight='balanced'                                                               |
| RF            | n_estimators = 50, 100, 500, 1000, 1500, 2000, 2500, 3000<br>max_features = 'auto', 'sqrt', 'log2'                                                     | class_weight='balanced'                                                               |
| XGB           | n_estimators = 50, 100, 500, 1000, 1500, 2000, 2500, 3000<br>max_depth = 10, 15<br>learning_rate = 0.01, 0.05                                          | gamma = 0<br>scale_pos_weight = 10559/8867<br>min_child_weight = 1<br>subsample = 0.5 |

**Table S2. Optimal hyperparameters in this work (continue)**

| <b>Descriptors</b> | <b>Method</b> | <b>Optimal hyperparameter</b>                                                    |
|--------------------|---------------|----------------------------------------------------------------------------------|
| F46                | GBM           | learning_rate = 0.01, max_depth = 10, max_features = 'sqrt', n_estimators = 100  |
|                    | LGBM          | learning_rate = 0.01, n_estimators = 500                                         |
|                    | RF            | max_features = 'log2', n_estimators = 3000                                       |
|                    | XGB           | learning_rate = 0.01, max_depth = 10, n_estimators = 500                         |
| UniRep             | GBM           | learning_rate = 0.01, max_depth = 10, max_features = 'auto', n_estimators = 500  |
|                    | LGBM          | learning_rate = 0.01, n_estimators = 500                                         |
|                    | RF            | max_features = 'sqrt', n_estimators = 1500                                       |
|                    | XGB           | learning_rate = 0.01, max_depth = 10, n_estimators = 500                         |
| TAPE               | GBM           | learning_rate = 0.01, max_depth = 10, max_features = 'sqrt', n_estimators = 1000 |
|                    | LGBM          | learning_rate = 0.01, n_estimators = 500                                         |
|                    | RF            | max_features = 'auto', n_estimators = 3000                                       |
|                    | XGB           | learning_rate = 0.01, max_depth = 10, n_estimators = 500                         |
| ESM-1b             | GBM           | learning_rate = 0.01, max_depth = 10, max_features = 'sqrt', n_estimators = 100  |
|                    | LGBM          | learning_rate = 0.05, n_estimators = 100                                         |
|                    | RF            | max_features = 'auto', n_estimators = 3000                                       |
|                    | XGB           | learning_rate = 0.01, max_depth = 10, n_estimators = 500                         |
| ESM-1v             | GBM           | learning_rate = 0.05, max_depth = 15, max_features = 'log2', n_estimators = 3000 |
|                    | LGBM          | learning_rate = 0.01, n_estimators = 500                                         |
|                    | RF            | max_features = 'sqrt', n_estimators = 500                                        |
|                    | XGB           | learning_rate = 0.01, max_depth = 10, n_estimators = 50                          |

**Table S2. Optimal hyperparameters in this work (continue)**

| <b>Descriptors</b> | <b>Method</b> | <b>Optimal hyperparameter</b>                                                    |
|--------------------|---------------|----------------------------------------------------------------------------------|
| F46/UniRep         | GBM           | learning_rate = 0.01, max_depth = 10, max_features = 'auto', n_estimators = 1000 |
|                    | LGBM          | learning_rate = 0.01, n_estimators = 500                                         |
|                    | RF            | max_features = 'auto', n_estimators = 1000                                       |
|                    | XGB           | learning_rate = 0.01, max_depth = 10, n_estimators = 100                         |
| F46/TAPE           | GBM           | learning_rate = 0.05, max_depth = 15, max_features = 'auto', n_estimators = 1500 |
|                    | LGBM          | learning_rate = 0.05, n_estimators = 100                                         |
|                    | RF            | max_features = 'auto', n_estimators = 2500                                       |
|                    | XGB           | learning_rate = 0.01, max_depth = 10, n_estimators = 500                         |
| F46/ESM-1b         | GBM           | learning_rate = 0.01, max_depth = 10, max_features = 'auto', n_estimators = 500  |
|                    | LGBM          | learning_rate = 0.05, n_estimators = 50                                          |
|                    | RF            | max_features = 'auto', n_estimators = 2500                                       |
|                    | XGB           | learning_rate = 0.01, max_depth = 10, n_estimators = 50                          |
| F46/ESM-1v         | GBM           | learning_rate = 0.01, max_depth = 10, max_features = 'auto', n_estimators = 100  |
|                    | LGBM          | learning_rate = 0.01, n_estimators = 50                                          |
|                    | RF            | max_features = 'auto', n_estimators = 500                                        |
|                    | XGB           | learning_rate = 0.01, max_depth = 10, n_estimators = 50                          |

**Table S3. The classifying performance of physicochemical properties of scFvs**

| Class                           | Feature Name                                            | Unit               | AUC          | p-value <sup>a</sup> |
|---------------------------------|---------------------------------------------------------|--------------------|--------------|----------------------|
| Net Charge                      | Net charge of all CDRs                                  | e <sup>-</sup>     | 0.521        | ***                  |
|                                 | Net charge of CDR1                                      | e <sup>-</sup>     | 0.556        | ***                  |
|                                 | Net charge of CDR2                                      | e <sup>-</sup>     | 0.413        | ***                  |
|                                 | Net charge of CDR3                                      | e <sup>-</sup>     | 0.521        | ***                  |
| Aggregation                     | AggScore                                                | unitless           | 0.506        | ***                  |
|                                 | Zyaggregator                                            | unitless           | 0.489        | ***                  |
|                                 | Zyaggregator_p                                          | unitless           | 0.541        | ***                  |
| Solvent-Accessible Surface Area | SASA of all hydrophobic atoms                           | Å <sup>2</sup>     | 0.502        | **                   |
|                                 | SASA of exposed hydrophobic atoms                       | Å <sup>2</sup>     | 0.512        | **                   |
| Hydrodynamic properties         | Partial specific volume (v <sub>bar</sub> )             | mL/g               | 0.474        | *                    |
|                                 | Molecular weight (M)                                    | Da                 | 0.470        |                      |
|                                 | Anhydrous volume sphere radius (R <sub>o</sub> )        | Å                  | 0.465        |                      |
|                                 | Anhydrous radius of gyration (R <sub>g</sub> )          | Å                  | <b>0.628</b> | ***                  |
|                                 | Maximum dimension (D <sub>max</sub> )                   | Å                  | 0.598        | ***                  |
|                                 | Axial ratio                                             | unitless           | 0.584        | ***                  |
|                                 | frictional ratio                                        | unitless           | 0.600        | ***                  |
|                                 | Translational diffusion coefficients (D <sub>t</sub> )  | cm <sup>2</sup> /s | 0.424        | ***                  |
|                                 | Translational hydrodynamic radius (R <sub>trans</sub> ) | Å                  | 0.576        | ***                  |
|                                 | Sedimentation coefficients (s)                          | second             | 0.426        | ***                  |
|                                 | Rotational diffusion coefficients (D <sub>r</sub> )     | s <sup>-1</sup>    | 0.404        | ***                  |
|                                 | Rotational hydrodynamic radius (R <sub>rot</sub> )      | Å                  | 0.596        | ***                  |
|                                 | Tumbling correlation time (tauC)                        | second             | 0.596        | ***                  |
|                                 | Asphericity                                             | unitless           | 0.621        | ***                  |
| CDR Length                      | Length of all CDRs                                      | count              | 0.482        | *                    |
|                                 | Length of CDR1                                          | count              | 0.393        | ***                  |
|                                 | Length of CDR2                                          | count              | 0.530        |                      |
|                                 | Length of CDR3                                          | count              | 0.545        | ***                  |

<sup>a</sup> \*\*\* p < 0.001, \*\* p < 0.01, and \* p < 0.05



**Table S4. The classifying performance of polyreactive motifs and isoelectric points of scFvs**

| Class                           | Feature Name                              | Unit     | AUC   | p-value <sup>a</sup> |
|---------------------------------|-------------------------------------------|----------|-------|----------------------|
| Polyreactive motifs             | Glycine (Gly) counts in CDR3              | count    | 0.521 | ***                  |
|                                 | Glutamine (Gln) counts in CDR3            | count    | 0.545 | ***                  |
|                                 | Arginine (Arg) counts in CDR3             | count    | 0.510 | ***                  |
|                                 | Valine (Val) counts in CDR3               | count    | 0.455 | ***                  |
|                                 | Tryptophan (Trp) counts in CDR3           | count    | 0.384 | ***                  |
|                                 | Glycine (Gly) ratio in CDR3               | unitless | 0.506 | ***                  |
|                                 | Glutamine (Gln) ratio in CDR3             | unitless | 0.512 | ***                  |
|                                 | Arginine (Arg) ratio in CDR3              | unitless | 0.507 | ***                  |
|                                 | Valine (Val) ratio in CDR3                | unitless | 0.447 | ***                  |
|                                 | Tryptophan (Trp) ratio in CDR3            | unitless | 0.382 | ***                  |
|                                 | Glycine (Gly) counts in CDRH3             | count    | 0.558 | ***                  |
|                                 | Glutamine (Gln) counts in CDRH3           | count    | 0.498 |                      |
|                                 | Arginine (Arg) counts in CDRH3            | count    | 0.508 | ***                  |
|                                 | Valine (Val) counts in CDRH3              | count    | 0.483 |                      |
|                                 | Tryptophan (Trp) counts in CDRH3          | count    | 0.383 | ***                  |
|                                 | Two valine motif counts (VV) in CDRH3     | count    | 0.508 | ***                  |
|                                 | Two tryptophan motif counts (WW) in CDRH3 | count    | 0.482 | ***                  |
|                                 | Glycine (Gly) ratio in CDRH3              | unitless | 0.548 | ***                  |
|                                 | Glutamine (Gln) ratio in CDRH3            | unitless | 0.498 |                      |
|                                 | Arginine (Arg) ratio in CDRH3             | unitless | 0.505 | ***                  |
| Valine (Val) ratio in CDRH3     | unitless                                  | 0.477    | **    |                      |
| Tryptophan (Trp) ratio in CDRH3 | unitless                                  | 0.383    | ***   |                      |
| Isoelectric points              | Isoelectric point of scFv                 | unitless | 0.535 | ***                  |
|                                 | Isoelectric point of CDR                  | unitless | 0.504 | *                    |

<sup>a</sup> \*\*\* p < 0.001, \*\* p < 0.01, and \* p < 0.05
